# Supplementary material for: Effect of tea catechins with caffeine on energy expenditure in middle-aged men and women: a randomized, double-blind, placebo-controlled, crossover trial
Source: Springer Nature journal article supplement (doi:10.1007/s00394-019-01976-9), 2019-05-06

### Flow Diagram

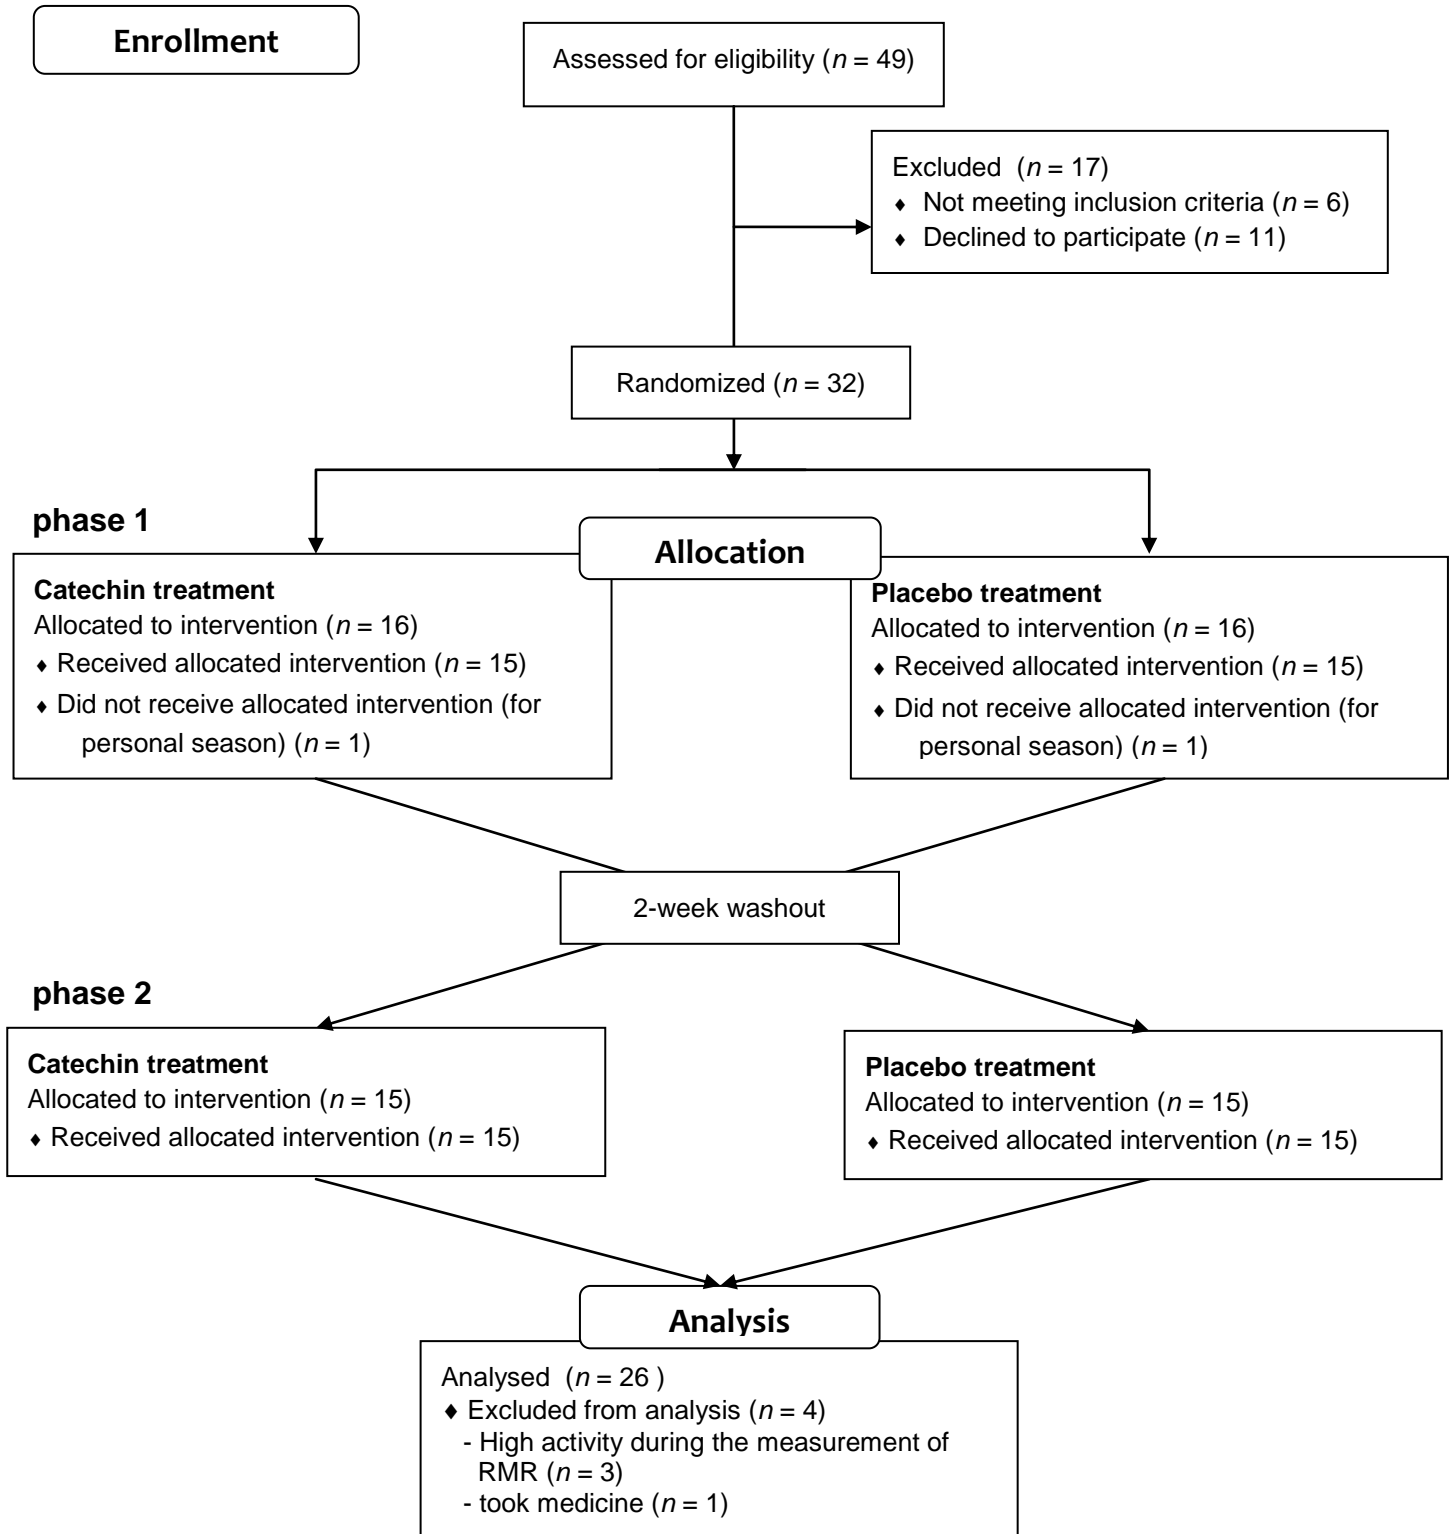

Supplement: MOESM1 [file 16702576]
