# Supplementary material for: Effect of tea catechins with caffeine on energy expenditure in middle-aged men and women: a randomized, double-blind, placebo-controlled, crossover trial
Source: Springer Nature journal article supplement (doi:10.1007/s00394-019-01976-9), 2019-05-06
Supplement: MOESM2 [file 16702576]

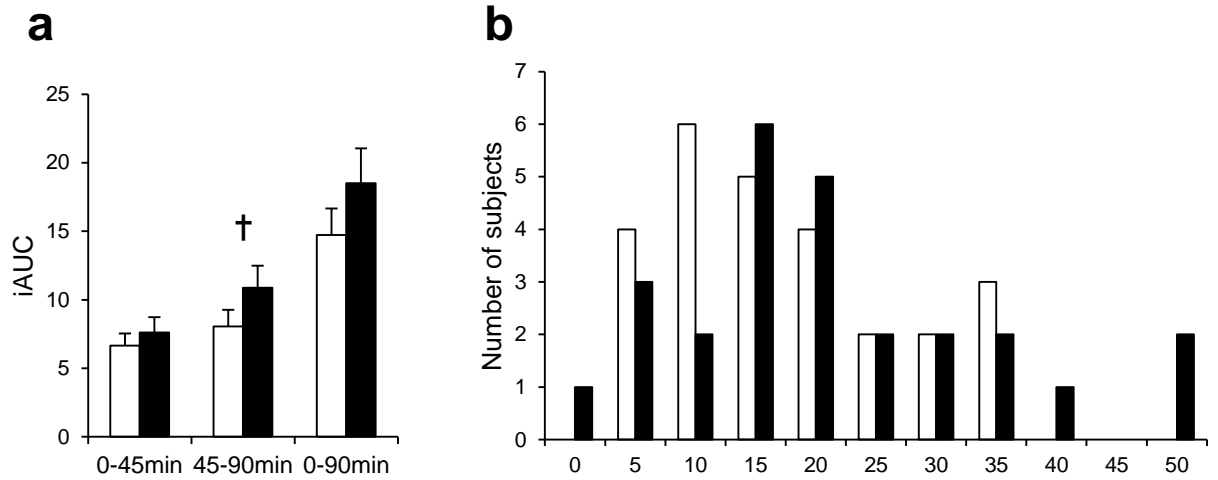

**Supplemental Fig. 2**

iAUC for energy expenditure following the 2-week intervention. **a** iAUC for energy expenditure at 0-45 min, 45-90 min and 0-90min (placebo treatment: white bar; catechin treatment: black bar). **b** shows histogram with a range of iAUC (kJ/90min) at 0-90 min (placebo treatment: white bar; catechin treatment: black bar). Data are expressed as means  $\pm$  SEM, n = 26, † paired t-test  $P < 0.1$ .

Katada *et al.*
